# Supplementary material for: RETRACTED: Isolation and Characterization of a Novel Lytic Phage, vB_PseuP-SA22, and Its Efficacy against Carbapenem-Resistant Pseudomonas aeruginosa
Source: MDPI journal article supplement (doi:10.3390/antibiotics12030497), 2023-03-02

Article

# Isolation and characterization of a novel lytic phage, vB\_PseuP-SA22, and its efficacy against carbapenem-resistant *Pseudomonas aeruginosa*

Addisu D. Teklemariam<sup>1</sup>, Rashad R. Al-Hindi<sup>1\*</sup>, Mona G. Alharbi<sup>1</sup>, Ibrahim Alotibi<sup>2</sup>, Sheren A. Azhari<sup>1</sup>, Ishtiaq Qadri<sup>1</sup>, Hatoon A. Niyazi<sup>3</sup>, Hanouf A. Niyazi<sup>3</sup>, Turki Alamri<sup>4</sup>, Ahmed Esmael<sup>5,6\*</sup> and Steve Harakeh<sup>7\*</sup>

<sup>1</sup>Department of Biological Sciences, Faculty of Science, King Abdulaziz University, Jeddah 21589, Saudi Arabia; [ademeke16@yahoo.com](mailto:ademeke16@yahoo.com) (A.D.T.); [mgalharbi@kau.edu.sa](mailto:mgalharbi@kau.edu.sa) (M.G.A.); [sazhari@kau.edu.sa](mailto:sazhari@kau.edu.sa) (S.A.A.); [ishtiaq80262@yahoo.com](mailto:ishtiaq80262@yahoo.com) (I.Q.)

<sup>2</sup>Health Information Technology Department, Applied College, King Abdulaziz University, Jeddah 21589, Saudi Arabia; [ialotibi@kau.edu.sa](mailto:ialotibi@kau.edu.sa) (I.A.)

<sup>3</sup>Department of Medical Microbiology and Parasitology, Faculty of Medicine, King Abdulaziz University, Jeddah 21589, Saudi Arabia; [hniyazi@kau.edu.sa](mailto:hniyazi@kau.edu.sa) (Hat.A.N); [hneiazi@kau.edu.sa](mailto:hneiazi@kau.edu.sa) (Han.A.N).

<sup>4</sup>Family and Community Medicine Department, Faculty of Medicine in Rabigh, King Abdulaziz University, Jeddah, Saudi Arabia; [olbalamri7@kau.edu.sa](mailto:olbalamri7@kau.edu.sa) (T.A.)

<sup>5</sup>Botany and Microbiology Department, Faculty of Science, Benha University, Benha 13518, Egypt

<sup>6</sup>Nebraska Center for Virology, University of Nebraska-Lincoln, Lincoln, NE 68583, USA

<sup>7</sup>King Fahd Medical Research Center, Yousef Abdullatif Jameel Chair of Prophetic Medicine Application, Faculty of Medicine, King Abdulaziz University, Jeddah 21589, Saudi Arabia; [sharakeh@gmail.com](mailto:sharakeh@gmail.com) (S.H.)

\*Correspondence: R.R.A., [rhindi@kau.edu.sa](mailto:rhindi@kau.edu.sa); A.E., [a7medesmael@gmail.com](mailto:a7medesmael@gmail.com); S. H., [sharakeh@gmail.com](mailto:sharakeh@gmail.com)

## Supplementary materials

**Supplementary Table S1.** Antibiotic disks used to test *P. aeruginosa* and their respective concentrations.

| No. | Antibiotic disks | Disk code | Concentration |
|-----|------------------|-----------|---------------|
| 1   | Colistin         | COL       | 10 µg         |
| 2   | Ciprofloxacin    | CIP       | 5 µg          |
| 3   | Streptomycin     | STR       | 10 µg         |
| 4   | Gentamicin       | GM        | 10 µg         |
| 5   | Neomycin         | NEO       | 15 µg         |
| 6   | Piperacillin     | PRL       | 100 µg        |
| 7   | Cefuroxime       | CXM       | 30 µg         |
| 8   | Cefotaxime       | CTX       | 30 µg         |
| 9   | Ceftriaxone      | CRO       | 30 µg         |
| 10  | Ceftazidime      | CAZ       | 30 µg         |
| 11  | Levofloxacin     | LEV       | 5 µg          |
| 12  | Imipenem         | IPM       | 10 µg         |
| 13  | Meropenem        | MEM       | 10 µg         |
| 14  | Amikacin         | AMK       | 30 µg         |
| 15  | Tobramycin       | TOB       | 10 µg         |
| 16  | Ertapenem        | ERT       | 10 µg         |

**Supplementary Table S2:** Annotated open reading frame (58 CDC) of vB\_PseudoP-SA22

| ORF     | Region      | Length | Direction | Function                             |
|---------|-------------|--------|-----------|--------------------------------------|
| ORF #1  | 452-757     | 306    | -         | Hypothetical protein                 |
| ORF #2  | 2812-3270   | 459    | +         | Hypothetical protein                 |
| ORF #3  | 3700-5148   | 1449   | +         | Terminase Large Subunit              |
| ORF #4  | 5149-7266   | 2118   | +         | Cell envelope integrity protein TolA |
| ORF #5  | 7269-7511   | 243    | +         | Hypothetical protein                 |
| ORF #6  | 7511-8503   | 993    | +         | Putative capsid and scaffold protein |
| ORF #7  | 8402-9361   | 960    | -         | Capsid and scaffold protein          |
| ORF #8  | 8522-9475   | 954    | +         | Major Capsid Protein                 |
| ORF #9  | 9524-9844   | 321    | +         | Hypothetical protein                 |
| ORF #10 | 9848-10474  | 627    | +         | Putative structural protein          |
| ORF #11 | 10317-10676 | 360    | +         | Hypothetical protein                 |
| ORF #12 | 10660-10908 | 249    | +         | Hypothetical protein                 |
| ORF #13 | 10898-11545 | 648    | +         | Tail fibers protein                  |

*Supplementary materials*

|         |             |      |   |                                                                  |
|---------|-------------|------|---|------------------------------------------------------------------|
| ORF #14 | 11554-13095 | 1542 | + | Tail protein                                                     |
| ORF #15 | 13092-13781 | 690  | + | Hypothetical protein                                             |
| ORF #16 | 13778-14212 | 435  | + | Hypothetical protein                                             |
| ORF #17 | 14193-15137 | 945  | + | Hypothetical protein                                             |
| ORF #18 | 15137-15520 | 384  | + | Putative structural protein                                      |
| ORF #19 | 15525-17048 | 1524 | + | Putative structural protein                                      |
| ORF #20 | 17204-20374 | 3171 | + | Putative structural protein                                      |
| ORF #21 | 20268-21272 | 1005 | + | Putative structural protein                                      |
| ORF #22 | 21287-21643 | 357  | + | Putative capsid decoration protein                               |
| ORF #23 | 22021-22260 | 240  | - | Hypothetical protein                                             |
| ORF #24 | 22642-23403 | 762  | - | Putative endonuclease                                            |
| ORF #25 | 23396-23746 | 351  | - | Putative endonuclease                                            |
| ORF #26 | 23628-24575 | 948  | - | Endonuclease                                                     |
| ORF #27 | 24550-25434 | 885  | - | DNA polymerase I                                                 |
| ORF #28 | 25434-25718 | 285  | - | Hypothetical protein                                             |
| ORF #29 | 25690-26259 | 570  | - | Hypothetical protein                                             |
| ORF #30 | 26171-26725 | 555  | - | DNA binding protein                                              |
| ORF #31 | 26795-28273 | 1479 | - | DNA polymerase II                                                |
| ORF #32 | 28635-29144 | 510  | - | Tail length tape measure protein                                 |
| ORF #33 | 29221-29508 | 288  | - | Putative holin                                                   |
| ORF #34 | 29471-29773 | 303  | + | Hypothetical protein                                             |
| ORF #35 | 29813-30046 | 234  | - | Hypothetical protein                                             |
| ORF #36 | 30082-30393 | 312  | - | Hypothetical protein                                             |
| ORF #37 | 30360-30869 | 510  | - | DNA polymerase III                                               |
| ORF #38 | 30853-32094 | 1242 | - | DNA primase                                                      |
| ORF #39 | 32563-32940 | 378  | - | Hypothetical protein                                             |
| ORF #40 | 32940-33338 | 399  | - | Putative glutamyl-tRNA<br>amidotransferase                       |
| ORF #41 | 33338-34219 | 882  | - | Hypothetical protein                                             |
| ORF #42 | 34578-36110 | 1533 | - | Putative L-glutamine-D-fructose-6-<br>phosphate amidotransferase |
| ORF #43 | 36122-37297 | 1176 | - | Hypothetical protein                                             |
| ORF #44 | 37273-37842 | 570  | - | Hypothetical protein                                             |
| ORF #45 | 37796-38803 | 1008 | + | Putative ligase-like domain<br>containing protein                |
| ORF #46 | 38632-39588 | 957  | - | Hypothetical protein                                             |
| ORF #47 | 39568-40122 | 555  | + | Hypothetical protein                                             |
| ORF #48 | 39607-40569 | 963  | - | Hypothetical protein                                             |

### Supplementary materials

|         |             |     |   |                      |
|---------|-------------|-----|---|----------------------|
| ORF #49 | 40791-41615 | 825 | - | Hypothetical protein |
| ORF #50 | 41850-42302 | 453 | - | Hypothetical protein |
| ORF #51 | 42247-42564 | 318 | + | Hypothetical protein |
| ORF #52 | 42653-43078 | 426 | - | Hypothetical protein |
| ORF #53 | 43078-43332 | 255 | - | Hypothetical protein |
| ORF #54 | 43338-43610 | 273 | - | Hypothetical protein |
| ORF #55 | 43610-43891 | 282 | - | Hypothetical protein |
| ORF #56 | 43881-44144 | 264 | - | Hypothetical protein |
| ORF #57 | 44058-44330 | 273 | + | Hypothetical protein |
| ORF #58 | 44460-44810 | 351 | + | Hypothetical protein |

**Supplementary Table S3.** Vitek 2 identification results

| Well | Test name                     | Amount/well (mg) | Mnemonic | Test result |
|------|-------------------------------|------------------|----------|-------------|
| 2    | Ala-Phe-Pro-ARYLAMIDASE       | 0.384            | APPA     | -           |
| 10   | Hydrogen Sulfide              | 0.0024           | H2S      | -           |
| 17   | BETA-GALACTOSIDASE            | 0.036            | BGLU     | -           |
| 23   | L-Proline ARYLAMIDASE         | 0.0234           | ProA     | +           |
| 33   | SACCHAROSE/SUCRALOSE          | 0.3              | SAC      | -           |
| 40   | L-LACTATE alkalinisation      | 0.15             | ILATK    | +           |
| 46   | Glycine Arylamidase           | 0.012            | GlyA     | -           |
| 58   | O/129 RESISTANCE              | 0.0105           | O129R    | +           |
| 3    | ADONITOL                      | 0.1875           | ADO      | -           |
| 11   | BETA-N-ACETYL-GLUCOSAMINIDASE | 0.0408           | BNAG     | -           |
| 18   | D-MALTOSE                     | 0.3              | dMAL     | -           |
| 26   | LIPASE                        | 0.0192           | LIP      | -           |
| 34   | d-TAGATOSE                    | 0.3              | dTAG     | -           |
| 4    | L-Pyrrolydonyl-ARILAMIDASE    | 0.018            | PyrA     | -           |
| 47   | ORNITHINE DECARBOXYLASE       | 0.3              | ODC      | -           |
| 59   | Glu-Gly-Arg-ARYLAMIDASE       | 0.0576           | GGAA     | -           |
| 12   | GlutamylArylamidase pNA       | 0.0324           | AGLTp    | +           |
| 19   | D-MANNITOL                    | 0.1875           | dMAN     | +           |

*Supplementary materials*

|    |                                     |        |       |   |
|----|-------------------------------------|--------|-------|---|
| 27 | PALATINOSE                          | 0.3    | PLE   | - |
| 35 | TREHALOSE                           | 0.3    | dTRE  | + |
| 42 | SUCCINATE alkanisation              | 0.15   | SUCT  | + |
| 48 | LYSINE DECARBOXYLASE                | 0.15   | LDC   | - |
| 5  | L-Arabitol                          | 0.3    | IARL  | - |
| 13 | D-Glucose                           | 0.3    | dGLU  | + |
| 20 | D-MANNOSE                           | 0.3    | dMNE  | + |
| 53 | L-HISTIDINE assimilation            | 0.087  | IHISa | - |
| 36 | CITRATE (SODIUM)                    | 0.054  | CIT   | + |
| 43 | Beta-N-ACETYL-<br>GALACTOSAMINIDASE | 0.0306 | NAGA  | - |
| 7  | D-CELLOBIOSE                        | 0.3    | dCEL  | - |
| 14 | GAMMA-GLUTAMYL-<br>TRANSFERASE      | 0.0228 | GGT   | + |
| 21 | BETA-XYLOSIDASE                     | 0.0324 | BXYL  | - |
| 31 | UREASE                              | 0.15   | URE   | - |
| 37 | MALONATE                            | 0.15   | MNT   | + |
| 44 | ALPHA-galactosidase                 | 0.036  | AGAL  | - |
| 56 | COUMARATE                           | 0.126  | CMT   | + |
| 64 | L-LACTATE assimilation              | 0.186  | ILATa | + |
| 9  | BETA-GALACTOSIDASE                  | 0.036  | BGAL  | - |
| 15 | FERMENTATION GLUCOSE                | 0.45   | OFF   | - |
| 22 | BETA-<br>ALANINEARYLAMIDASE<br>pNA  | 0.0174 | BAlap | + |
| 32 | D-SORBITOL                          | 0.1875 | dSOR  | - |
| 39 | 5-KETO-D-GLUCONATE                  | 0.3    | 5KG   | - |
| 45 | PHOSPHATASE                         | 0.0504 | PHOS  | - |
| 57 | BETA-GLUCORONIDASE                  | 0.0378 | BGUR  | - |

## Supplementary materials

**Supplementary Figure S1.** Genomic feature of the predicted rho-independent terminators. The terminators were composed of loops (**red**) and stems (**blue**) located at different regions of the genomic sequence.

```
>ccttgatctgcaagataacgctcgctcgctcttccagttggcccttgctctatggcgcggtt
1 3358 Both + GAAAGATAGTAAGGCAGCCTATGATGCAGCCCAAGGGCAAGTATCTCAGCTGCCTTTTTCGA
2 9412 Both + CTAACCCAACGGGGCCCTTCGGGGCCCTTTGTTTCCCCT -13.90
3 21577 Erpin - ACCAAAAAAGGGCCCAAGGGTATCATCCCAAGGGGCCTTATCTTTAGCTC NA
4 21579 Both + GCTAAAGATAAGGCCCTTGGGATGATACCCTTGGGGCCTTTTTTTTGGTTA NA
5 22084 Rnamotif - GCTCTTGCGAAGGCTGAGGCGAAGGCCTTTTCCTTTGAA -5.20
6 39660 Rnamotif - GTAGATAGCGAGGTGGGAGGTTTCATCCGCCTTTATCTTCATA -7.30
7 41625 Rnamotif - CACCCAGGTAAGCCCCCGCATGATTGGGGCTTCTATGTACTG -8.70
8 41650 Rnamotif + GGGGGCTTACCTGGGTGGCCAGCAGGCCGTCTATCTTATGTATGT -6.70
```



## Supplementary materials

**Supplementary Figure S2.** Predicted tRNA structure. (A) Asparagine (Asn) (2461 - 2533), (B) Aspartic acid (Asp) (2541 - 2613), (C) Proline (Pro) (2713 - 2786).

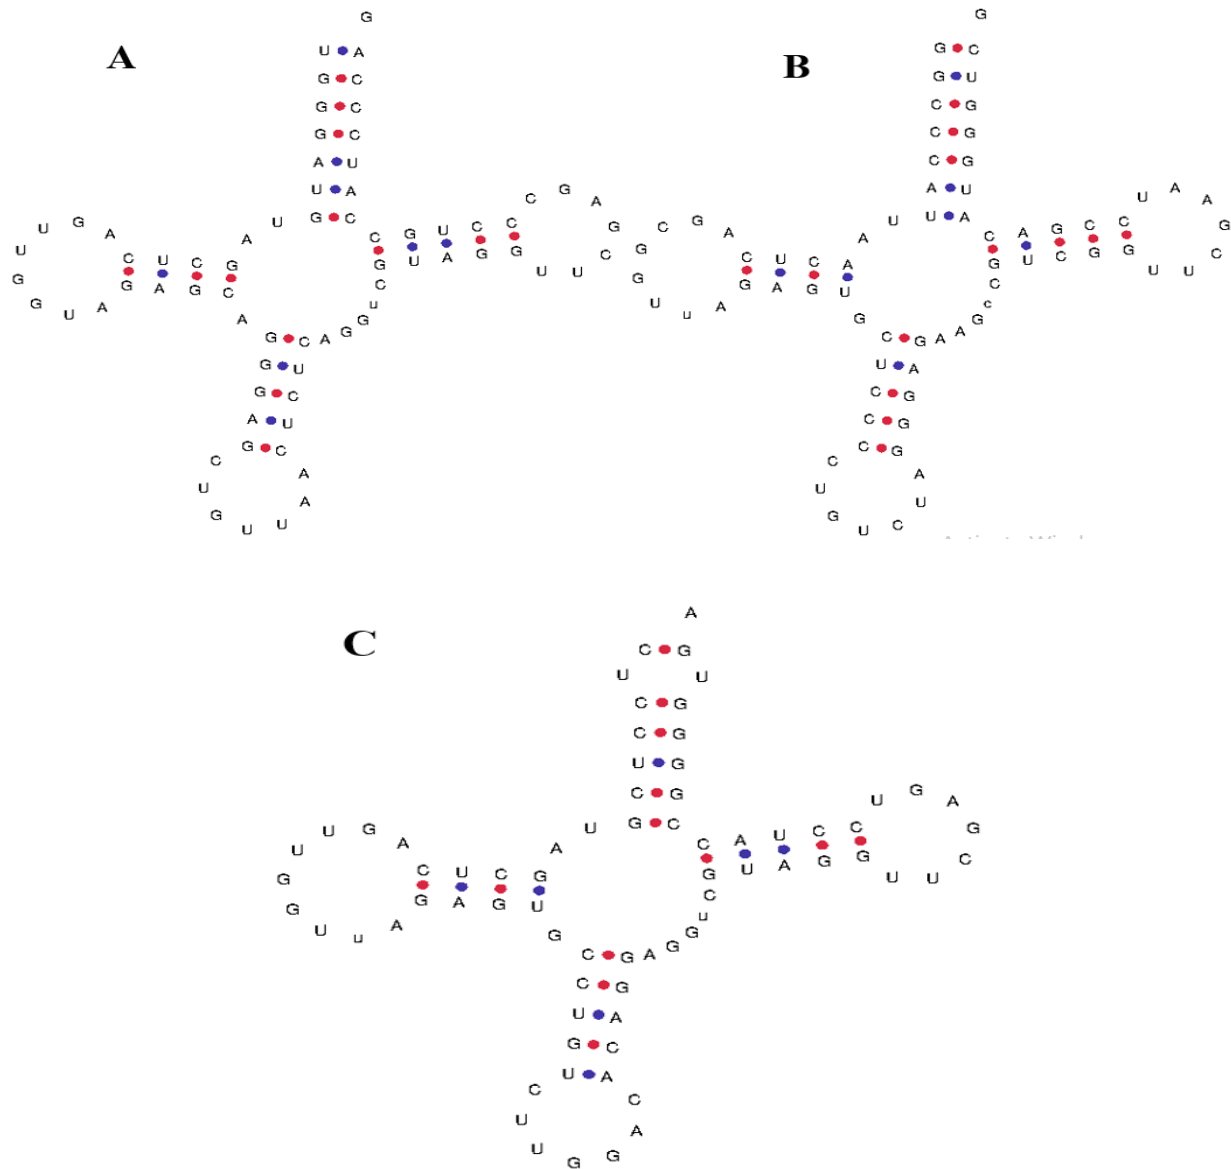

## Supplementary materials

**Supplementary Figure S3.** API-20E test showing the 7-digit profile number which indicated that the organism confirmed to be 97% *P. aeruginosa* with reference to the API-20E analytical profile index book.

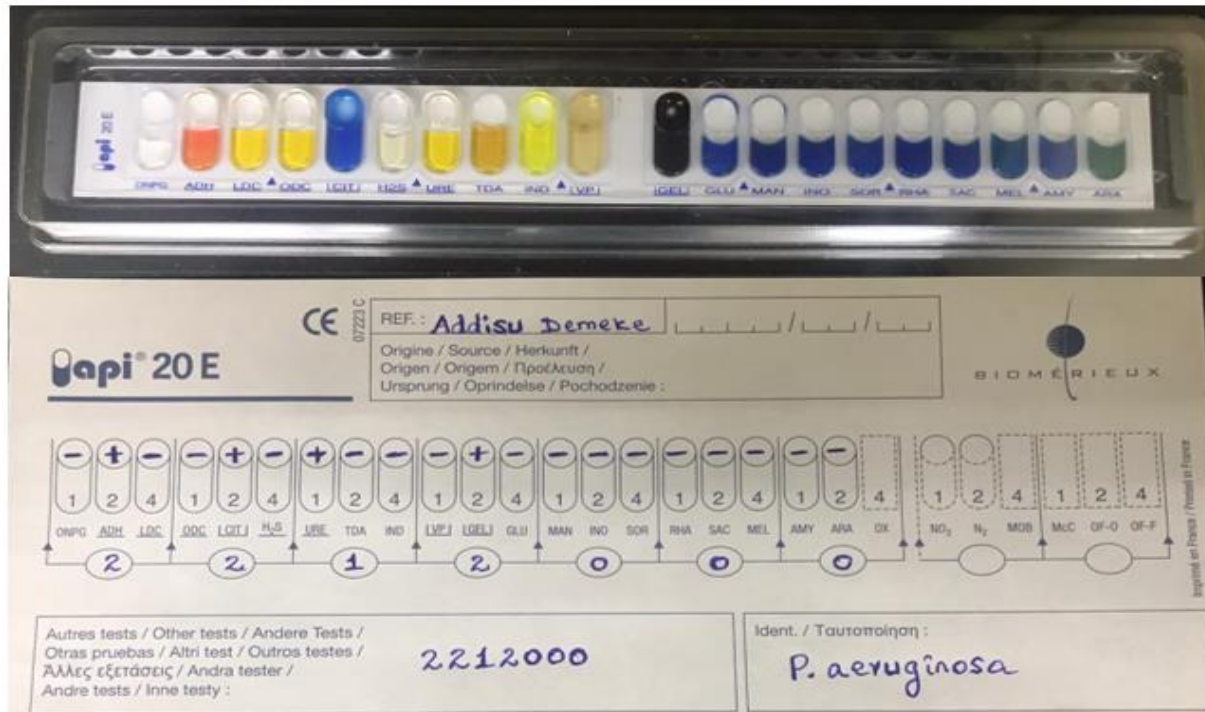

**Supplementary Figure S4.** Photographs showing qualitative detection of biofilm production. (A) Test tube biofilm production assay (test tube ring test) - the right three



## *Supplementary materials*

tubes are showing positive triplicated results and the left tube serves as a negative control. (B) Biofilm visualized under UV light (arrow indicating the biofilm formed a clear white ring). (C) Biofilm stained using 0.1% CV. (D) CV assay in 96 well plates.

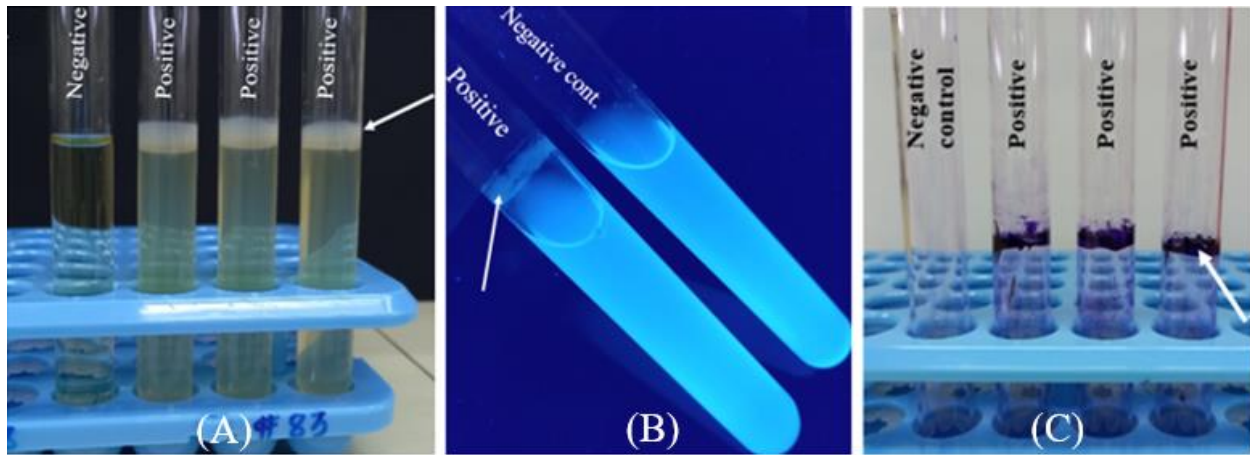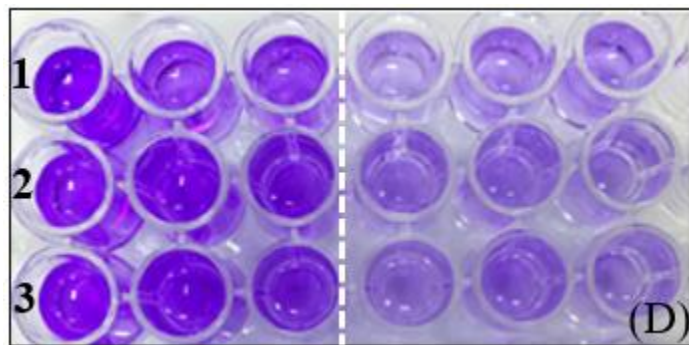

Supplement: s1 [file s1]
